# Supplementary material for: The Role of MicroRNAs in the Regulation of Gastric Cancer Stem Cells: A Meta-Analysis of the Current Status
Source: PubMed Central journal article supplement (PMC6572052; doi:10.3390/jcm8050639), 2019-05-09
Supplement: jcm-08-00639-s001.pdf [file jcm-08-00639-s001.pdf]

## Supplementary Materials

# The Role of MicroRNAs in the Regulation of Gastric Cancer Stem Cells: A Meta-Analysis of the Current Status

Vitalba Ruggieri <sup>1</sup>, Sabino Russi <sup>1</sup>, Pietro Zoppoli <sup>1</sup>, Francesco La Rocca <sup>1</sup>, Tiziana Angrisano <sup>2</sup>, Geppino Falco <sup>2,3</sup>, Giovanni Calice <sup>1</sup> and Simona Laurino <sup>1,\*</sup>

<sup>1</sup> Laboratory of Preclinical and Translational Research, IRCCS-CROB, Referral Cancer Center of Basilicata, Rionero in Vulture, Italy. vitalba.ruggieri@crob.it (V.R.); sabino.russi@crob.it (S.R.); pietro.zoppoli@crob.it (P.Z.); francesco.larocca@crob.it (F.L.R.); giovanni.calice@crob.it (G.C.)

<sup>2</sup> Department of Biology, University of Naples Federico II, Naples, Italy. tiziana.angrisano@unina.it (T.A.)

<sup>3</sup> Section of Stem Cell and Development, Istituto di Ricerche Genetiche "Gaetano Salvatore" Biogem s.c. a.r.l., Ariano Irpino, Italy. geppino.falco@unina.it (G.F.)

\* Correspondence: simona.laurino@crob.it (S.L.); Tel.: +39 0972 726239

**Table S1.** Significant KEGG pathway by predicted up regulated miRNAs.

| KEGG pathway                                 | <i>p</i> -value | N. of Genes | N. of miRNAs |
|----------------------------------------------|-----------------|-------------|--------------|
| Metabolism of xenobiotics by cytochrome P450 | 0               | 3           | 1            |
| TGF-beta signaling pathway                   | 3.96E-05        | 19          | 3            |
| Estrogen signaling pathway                   | 0.0002          | 16          | 3            |
| Prolactin signaling pathway                  | 0.0005          | 20          | 2            |
| Axon guidance                                | 0.0017          | 27          | 2            |
| Lysine degradation                           | 0.0023          | 7           | 1            |
| Hippo signaling pathway                      | 0.0080          | 19          | 1            |
| Regulation of actin cytoskeleton             | 0.0177          | 32          | 1            |
| Biotin metabolism                            | 0.0261          | 1           | 1            |

*P*-value < 0.05 was considered as statistically significant.

**Table S2.** Significant KEGG pathway by predicted down regulated miRNAs.

| KEGG pathway                                             | <i>p</i> -value | N. of Genes | N. of miRNAs |
|----------------------------------------------------------|-----------------|-------------|--------------|
| Lysine degradation                                       | 0               | 14          | 10           |
| Signaling pathways regulating pluripotency of stem cells | 0               | 60          | 11           |
| Estrogen signaling pathway                               | 0               | 29          | 13           |
| Proteoglycans in cancer                                  | 0               | 67          | 13           |
| TGF-beta signaling pathway                               | 0               | 36          | 16           |
| Axon guidance                                            | 1.05E-08        | 39          | 11           |
| Prion diseases                                           | 0.0001          | 3           | 1            |
| Thyroid hormone signaling pathway                        | 0.0004          | 21          | 2            |
| Glioma                                                   | 0.0012          | 26          | 8            |
| MAPK signaling pathway                                   | 0.0019          | 65          | 6            |
| Neurotrophin signaling pathway                           | 0.0045          | 25          | 8            |
| FoxO signaling pathway                                   | 0.0103          | 48          | 4            |
| Prolactin signaling pathway                              | 0.0193          | 20          | 7            |
| Morphine addiction                                       | 0.0245          | 19          | 6            |
| Hippo signaling pathway                                  | 0.0271          | 46          | 5            |
| Regulation of actin cytoskeleton                         | 0.0316          | 35          | 6            |
| Pancreatic cancer                                        | 0.0387          | 10          | 2            |
| Chronic myeloid leukemia                                 | 0.0475          | 22          | 3            |

*P*-value < 0.05 was considered as statistically significant.

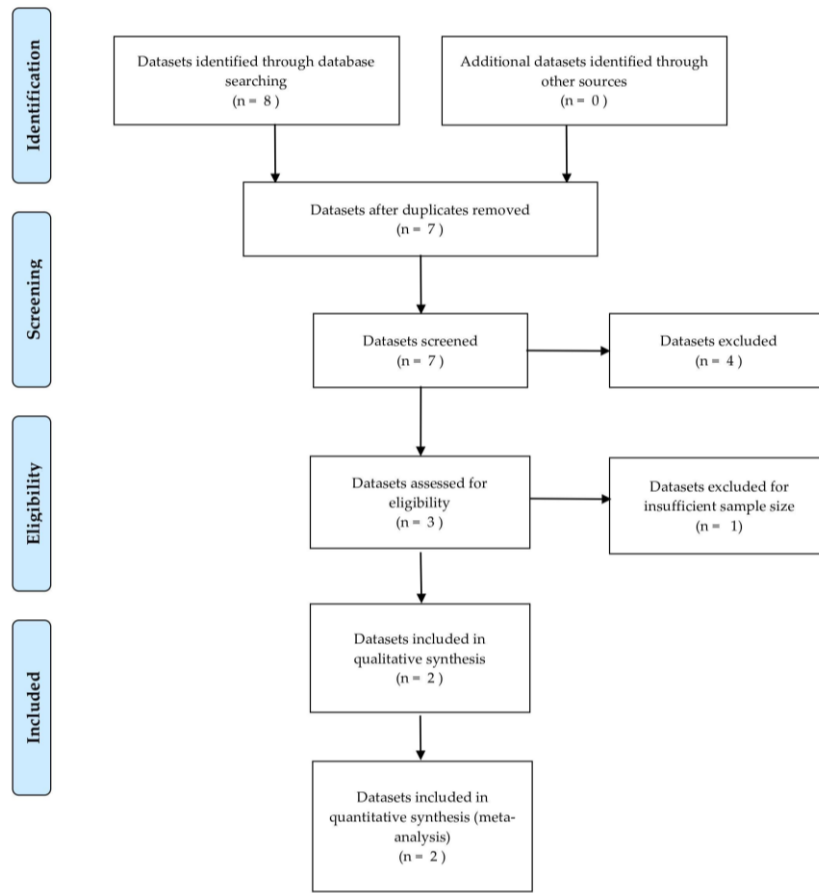

**Figure S1.** PRISMA (Preferred Reporting Items for Systemic Reviews and Meta-Analyses) flow diagram.
